# Supplementary material
Source: PubMed Central journal article supplement (PMC4355236)

Figure S1

(a)

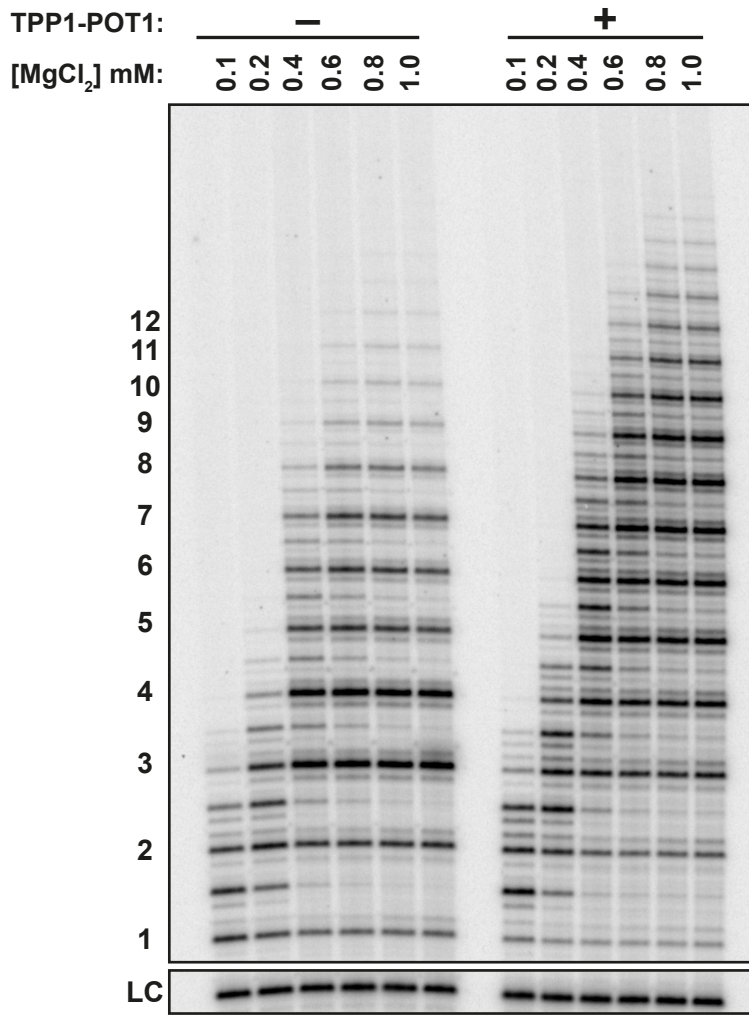

(b)

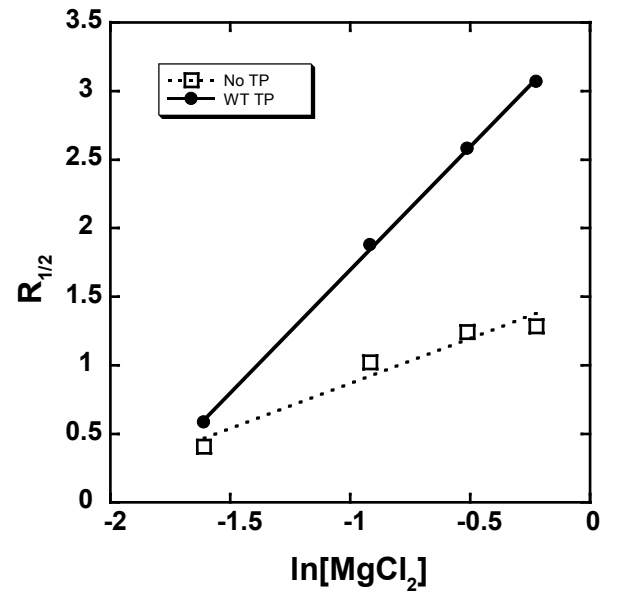

Supplement: NIHMS658119-supplement-1.pdf [file NIHMS658119-supplement-1.pdf]

**Figure S2**

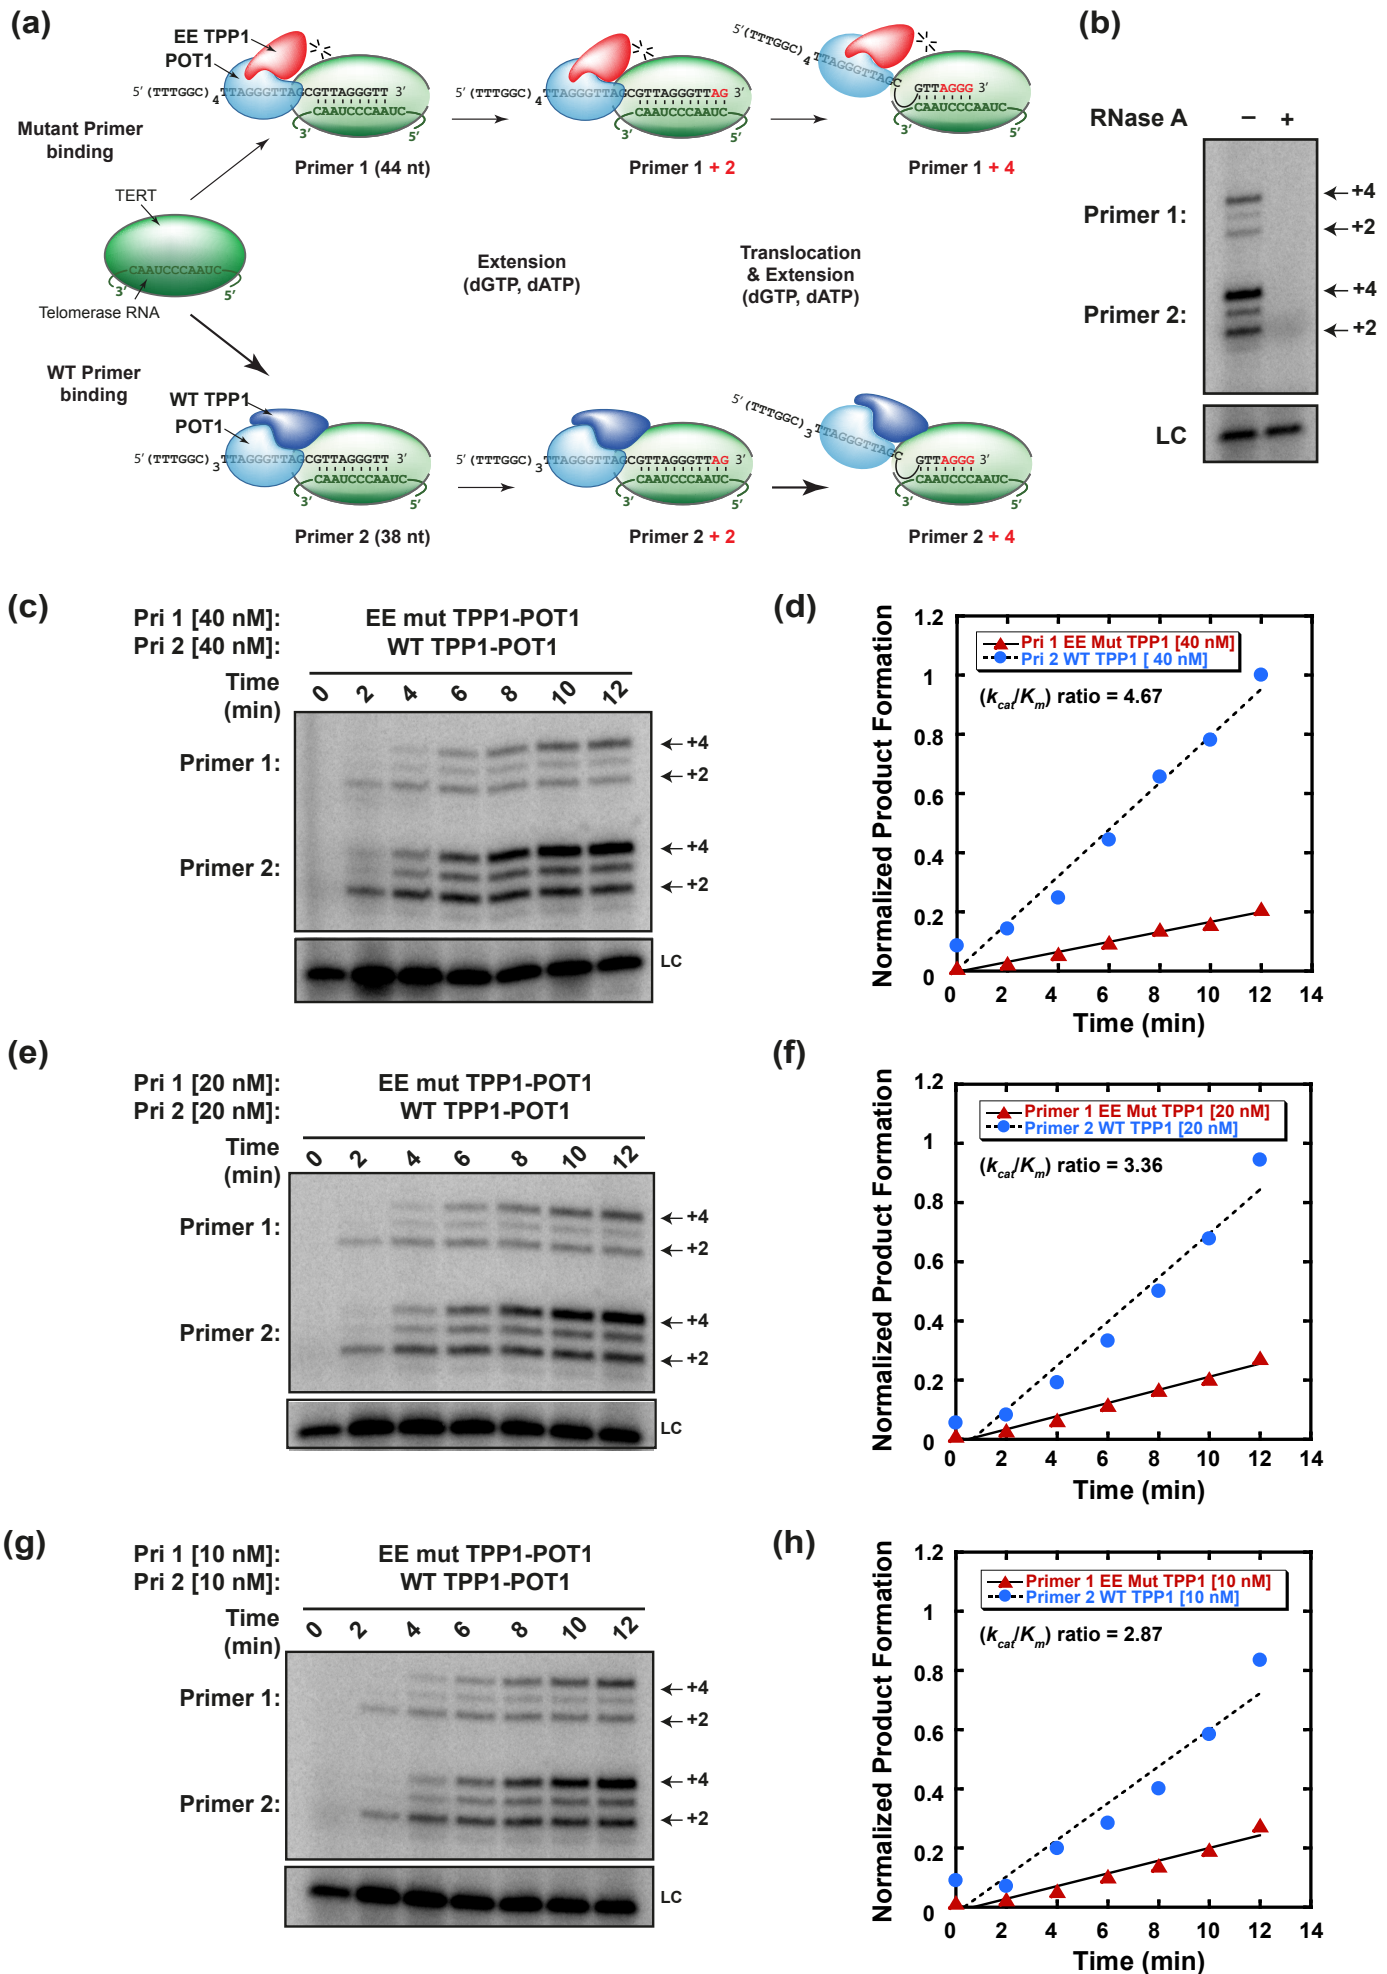

Supplement: NIHMS658119-supplement-2.pdf [file NIHMS658119-supplement-2.pdf]

**Figure S3**

(a)

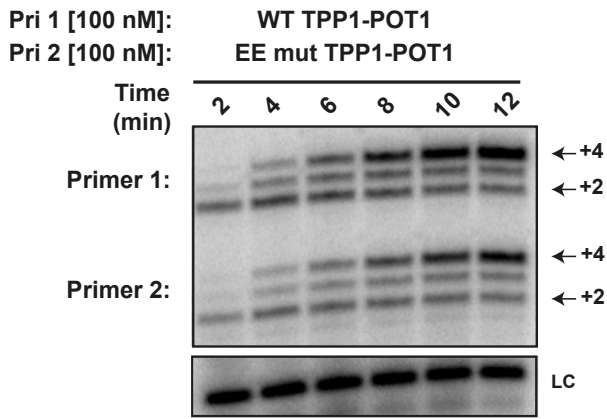

(b)

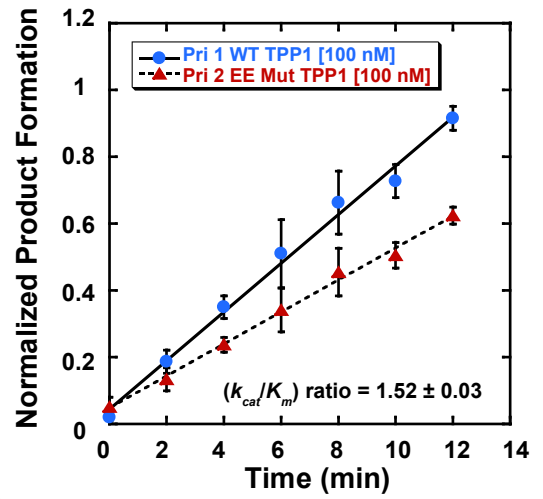

(c)

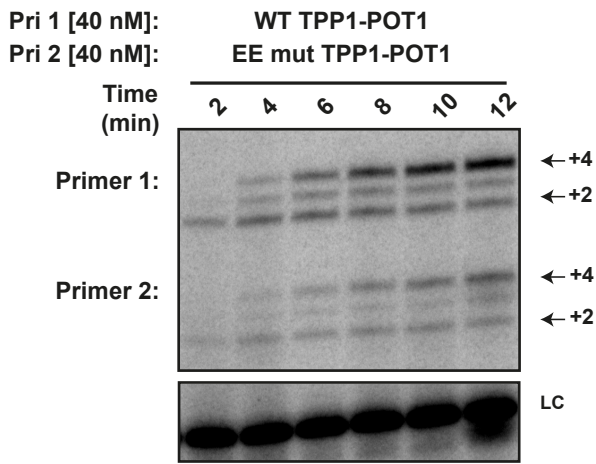

(d)

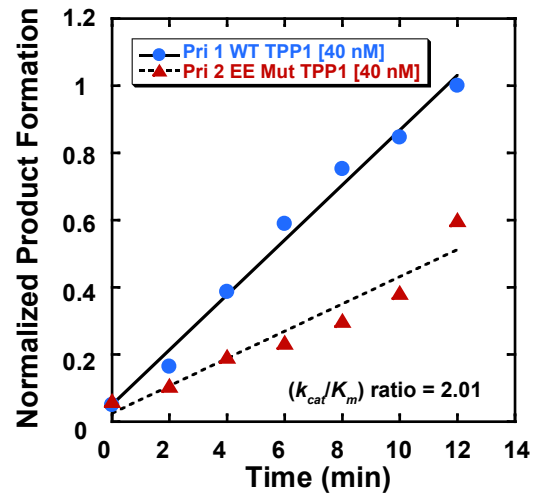

Supplement: NIHMS658119-supplement-3.pdf [file NIHMS658119-supplement-3.pdf]
